# Supplementary material for: Coverage gaps in empiric antibiotic regimens used to treat serious bacterial infections in neonates and children in Southeast Asia and the Pacific
Source: PubMed Central journal article supplement (PMC10934317; doi:10.1016/j.lansea.2023.100291), 2023-10-31

Supplementary Figure 1. PRISMA flow chart

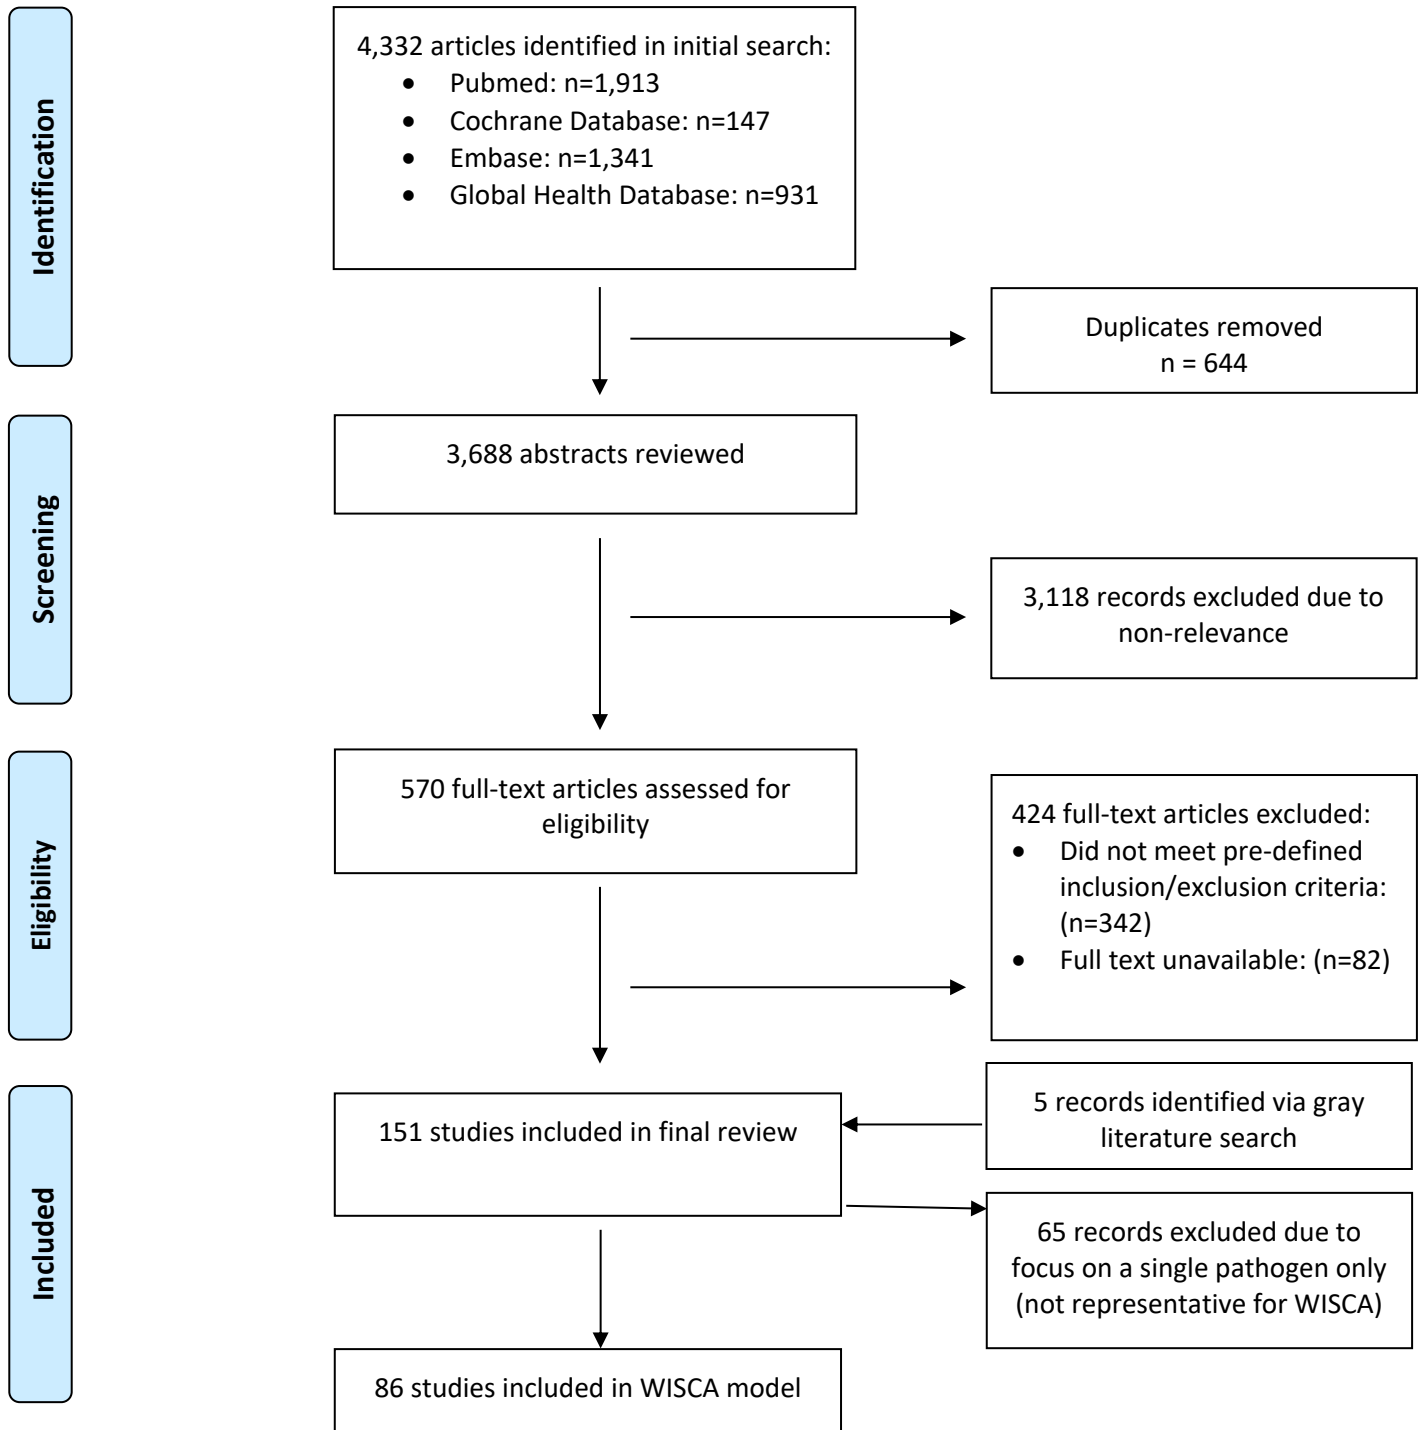

Supplement: mmc5.pdf [file mmc5.pdf]
